# Supplementary material
Source: publisher figshare collection journal article supplement (https://acs.figshare.com/ndownloader/files/13304645)
Supplement: Supplementary file 1 [file 13304645]

**Supporting information to**

# **Surfaces with Dual Functionality through Specific Coimmobilization of Self-Assembled Polymeric Nanostructures**

*Serena Rigo, Gesine Gunkel-Grabole, Wolfgang Meier, Cornelia G. Palivan\**

Department of Chemistry, University of Basel, Mattenstrasse 24a, BPR 1096, P.O. Box 3350,  
CH-4002 Basel, Switzerland

\* Corresponding Author: [cornelia.palivan@unibas.ch](mailto:cornelia.palivan@unibas.ch)

## **Contents:**

- 1. Azide containing polymersomes**
- 2. Methacrylate containing nanoassemblies**
- 3. DBCO functionalized surface**
- 4. Immobilized azide containing vesicles**
- 5. Coimmobilization of azide containing vesicles with methacrylate exposing nanostructures**

## 1. Azide containing polymersomes

PMOXA<sub>6</sub>-*b*-PDMS<sub>43</sub>-*b*-PMOXA<sub>6</sub> copolymer based polymersomes with different ratios (0 % to 10 %) of azide-terminated PMOXA<sub>7</sub>-*b*-PDMS<sub>40</sub>-*b*-PMOXA<sub>7</sub> copolymers were limited in their size distribution by extrusion through 200 nm and further size exclusion on Sepharose 2B.

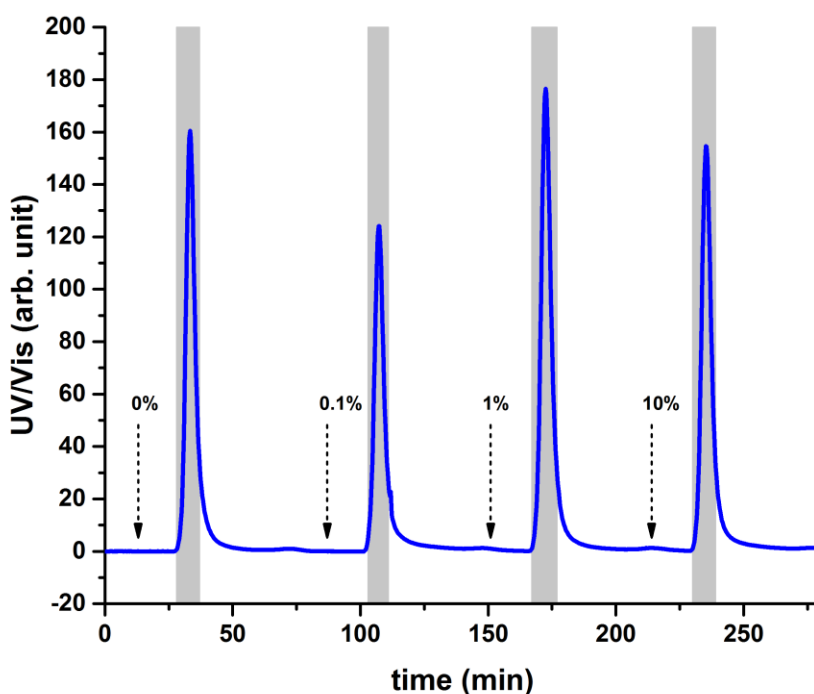

**Figure S1.** Size exclusion chromatograms (UV-Vis absorption at 280 nm) of polymersomes prepared from block copolymer mixtures of 0.0, 0.1, 1.0, and 10 mol% of azide functionalized polymer with respect to hydroxy functionalized ones. Injection volumes were 880, 850, 860, and 860  $\mu$ L respectively. Arrows indicate the time of injection. The polymersomes were eluted in PBS and collected as a single fraction indicated by the grey areas.

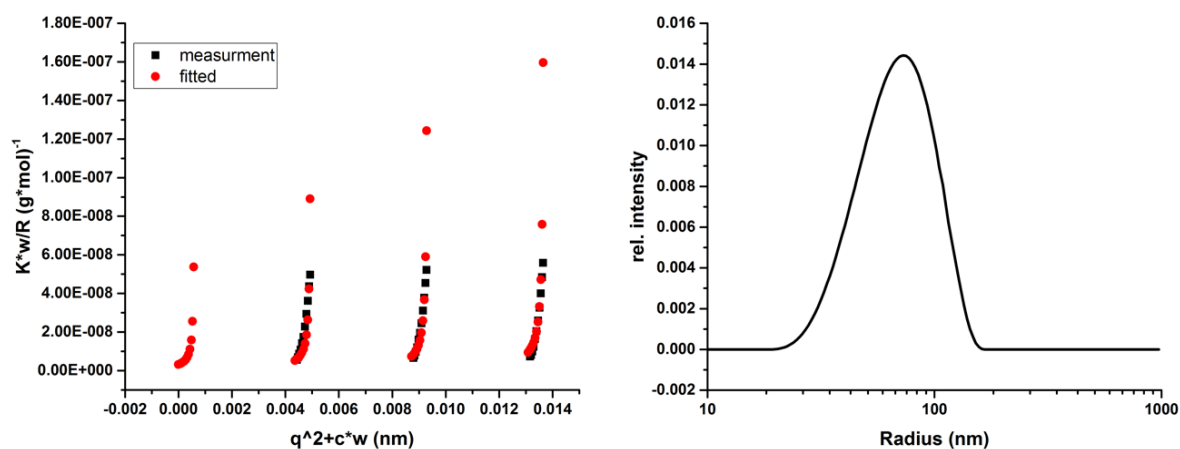

**Figure S2.** LS data of self-assembled structures containing 1 mol% azide-terminated polymers.

The extruded solutions containing polymersomes were diluted with filtered (Millex-LCR syringe filters, hydrophilic, polytetrafluoroethylene - PTFE,  $0.45 \mu\text{m}$ ; Millipore) PBS buffer to obtain the desired polymer concentrations;  $0.3$ ,  $0.2$ , and  $0.1 \text{ mg mL}^{-1}$ . Left: Zimm plot with obtained SLS data acquired every  $10^\circ$  between  $40$  and  $110^\circ$ . Right: DLS of the  $0.1 \text{ mg mL}^{-1}$  solution of polymersomes recorded at  $90^\circ$ .

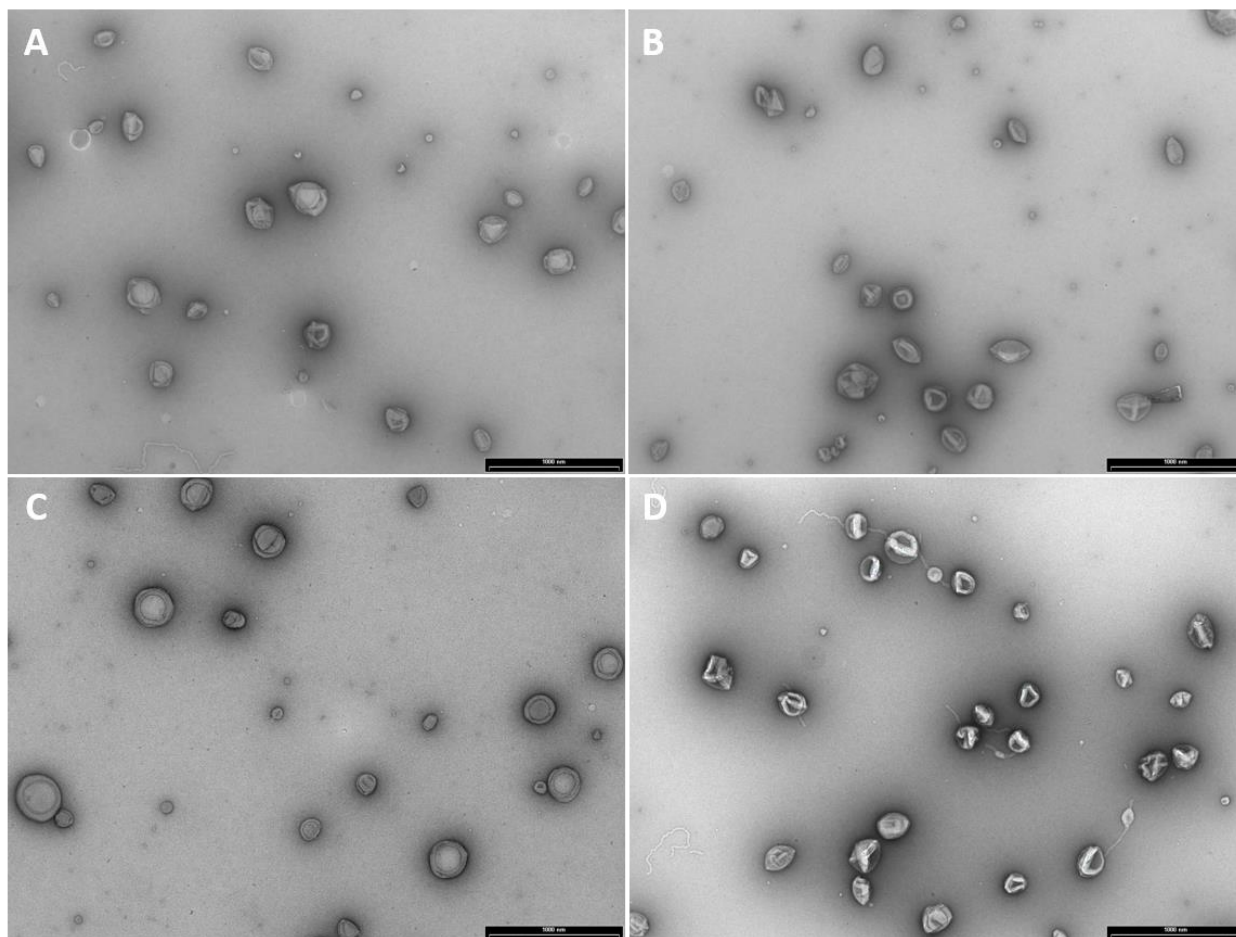

**Figure S3.** TEM images of polymersomes with different ratios of azide-terminated polymers: A) 0.0 mol% N<sub>3</sub>, B) 0.1 mol% N<sub>3</sub>, C) 1.0 mol% N<sub>3</sub>, D) 10 mol% N<sub>3</sub>. Scale bars: 1 µm.

## 2. Methacrylate containing nanoassemblies

Methacrylate nanoassemblies were self-assembled from methacrylate-terminated PMOXA-*b*-PDMS-*b*-PMOXA containing traces (approximately 0.5 mol%) of SRB labeled PMOXA-*b*-PDMS-*b*-PMOXA polymers. The nanostructures were characterized by DLS and TEM. The polymersomes have a diameter of  $182 \pm 96$  nm and the micelles of  $82 \pm 50$  nm according to number PSD. The higher polydispersity compared to the azide-exposing polymersomes can also be seen in the TEM images where larger polymersomes coexist with smaller particles. This is because the methacrylate nanostructures have been used without further treatment to cap their size by extrusion or SEC.

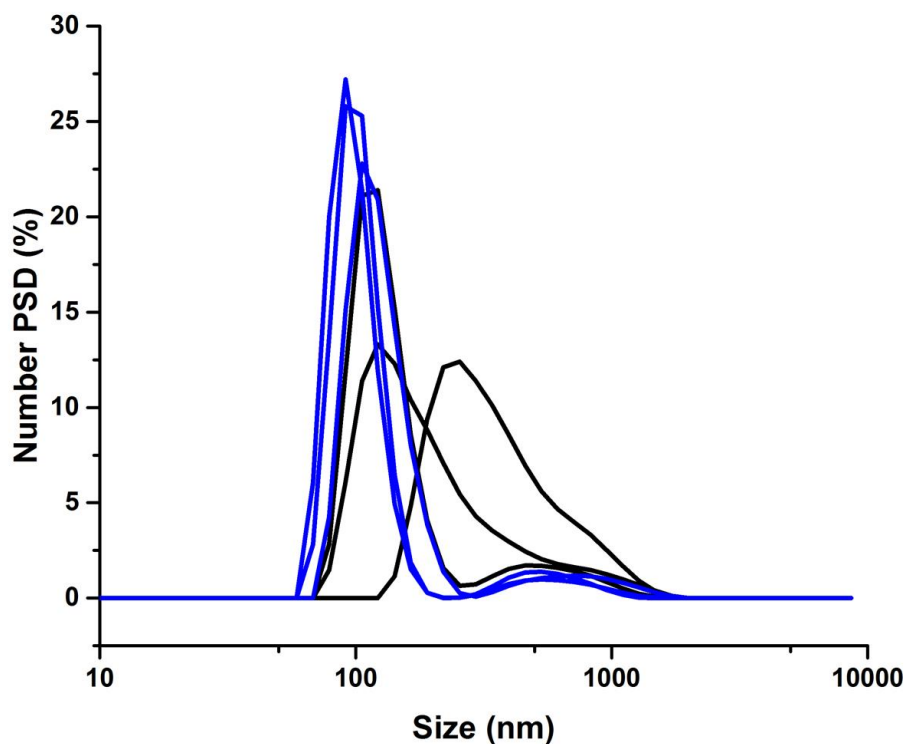

**Figure S4.** DLS of two separately, but identically prepared methacrylate solutions of polymersomes, which were self-assembled from methacrylate terminated PMOXA<sub>19</sub>-*b*-PDMS<sub>67</sub>-*b*-PMOXA<sub>19</sub> block copolymer. The number average PSD of each measurement is shown and results in a diameter of  $182 \pm 96$  nm. Each color represents one identically prepared sample of which three measurements were done.

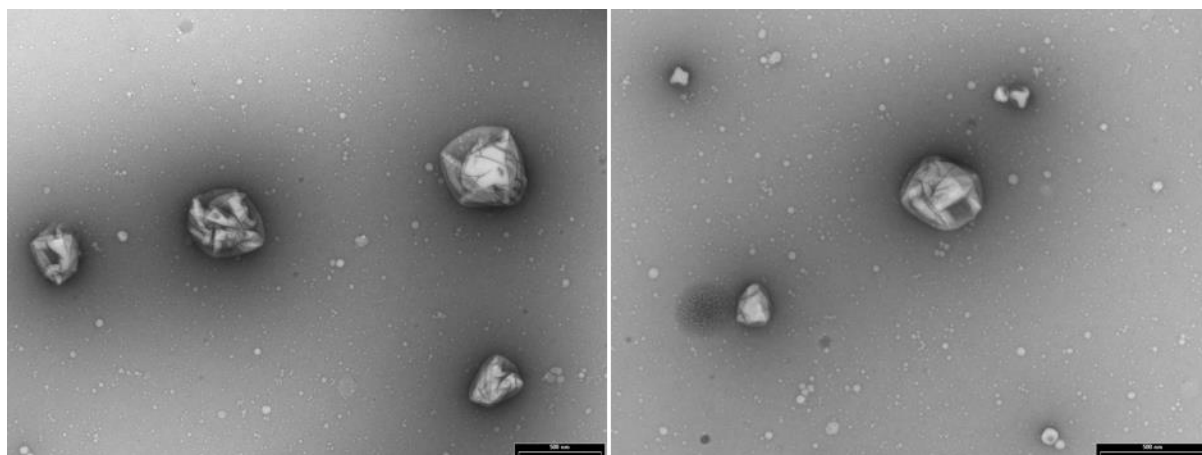

**Figure S5.** TEM micrographs of the same sample of methacrylate polymersomes, stained by uranyl acetate, scale bars: 500 nm.

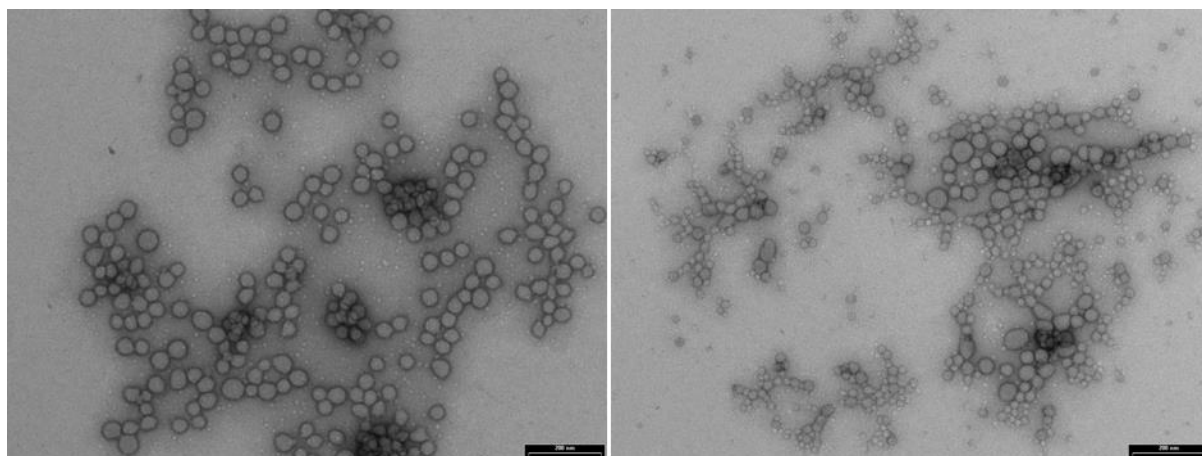

**Figure S6.** TEM micrographs of the same sample of methacrylate micelles, stained by uranyl acetate, scale bar: 200 nm.

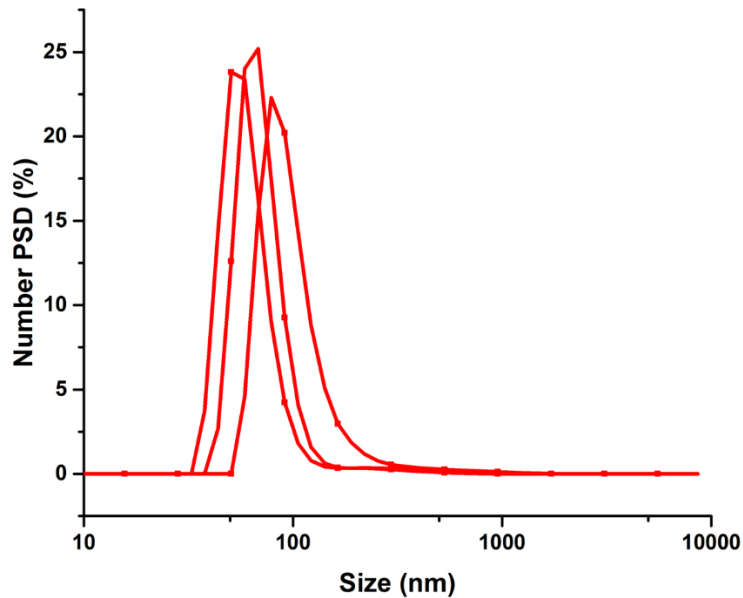

**Figure S7.** DLS of a solution of methacrylate micelles self-assembled by PMOXA<sub>25</sub>-*b*-PDMS<sub>54</sub>-*b*-PMOXA<sub>25</sub>. The number average PSD of three measurements of the same sample are displayed and result in an average diameter of  $82 \pm 50$  nm.

### 3. DBCO functionalized surface

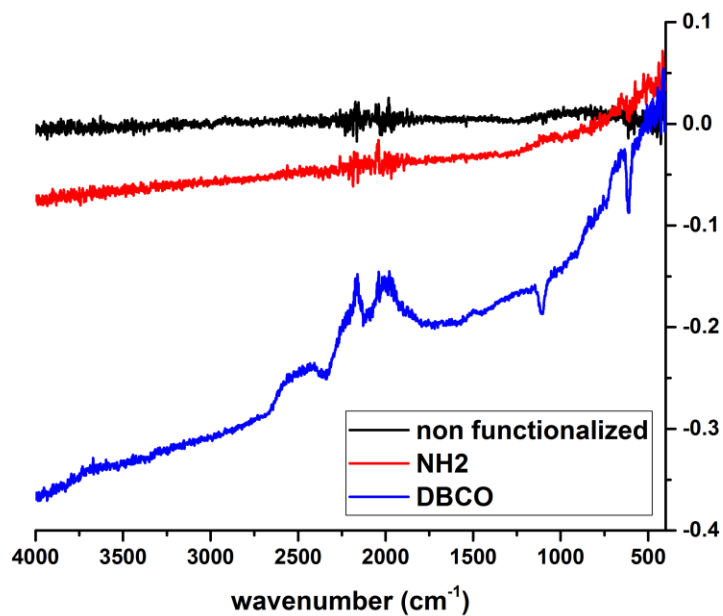

**Figure S8.** ATR-FTIR of silica wafers during the different functionalization steps.

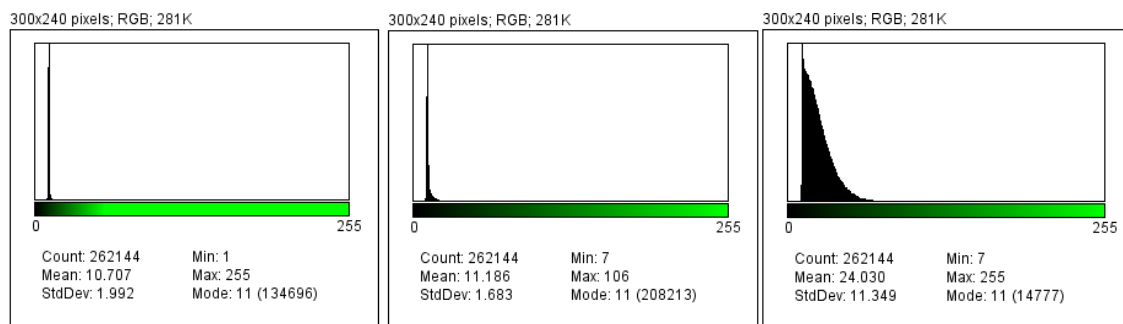

**Figure S9:** Intensity histograms from left to right: non functionalized surface,  $\text{NH}_2$  functionalized surface and DBCO functionalized surface.



#### 4. Immobilized azide containing vesicles

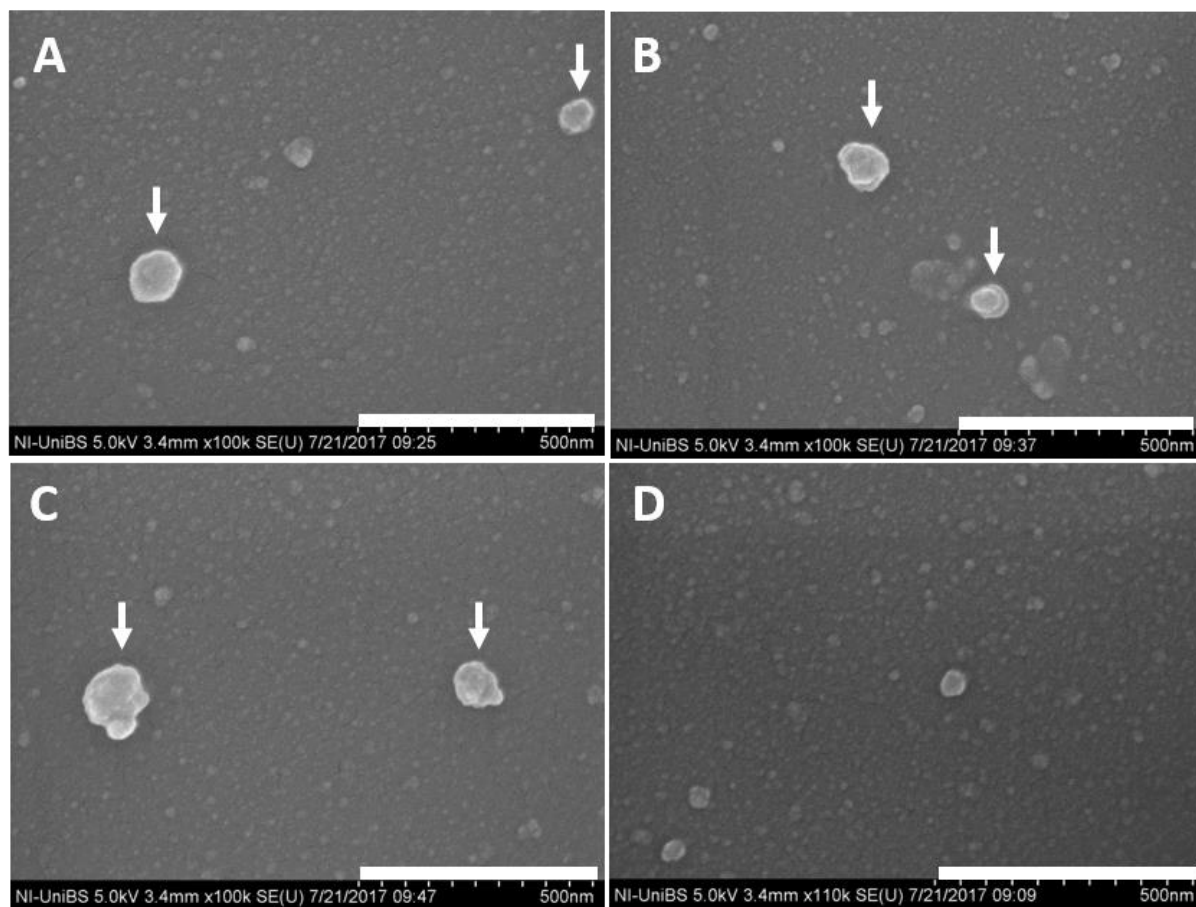

**Figure S10.** SEM images of immobilized, bodipy free, platinum sputtered polymersomes with different ratios of azide-terminated polymers A) 0.1 % B) 1.0 % C) 10 % D) 0.0 % on DBCO functionalized silica wafers. Scale bars: 500 nm. The arrows indicate immobilized vesicles.

**Table S1.** Polymersomes were mixed with Bodipy prior immobilization to be able to visualize them on the surface by airyscan CLSM. Several images of immobilized polymersomes were taken for each sample. The round fluorescent dots were counted by analyze particles on Fiji by ImageJ. The number of immobilized polymersomes per area of the image was calculated.

| <b>Azide ratio</b>                                         | <b>0.1 mol%</b> | <b>1 mol%</b> | <b>10 mol%</b> | <b>0 mol%</b> |
|------------------------------------------------------------|-----------------|---------------|----------------|---------------|
| <b>Polymersomes per<br/>100 <math>\mu\text{m}^2</math></b> | 40.7            | 4.4           | 31.3           | 1.6           |
|                                                            | 33.5            | 5.3           | 23.6           | 1.2           |
|                                                            | 43.5            | 9.4           | 26.3           | 1.2           |
|                                                            | 36.8            | 37.0          | 6.1            | 0.9           |
|                                                            | 46.8            | 44.1          | 13.9           | 2.7           |
| <b>Average <math>\pm</math><br/>standard deviation</b>     | 40.3 $\pm$ 4.7  | 20.0 $\pm$ 17 | 20.2 $\pm$ 9.1 | 1.5 $\pm$ 0.6 |

## 5. Coimmobilization of azide containing vesicles with methacrylate-exposing nanostructures

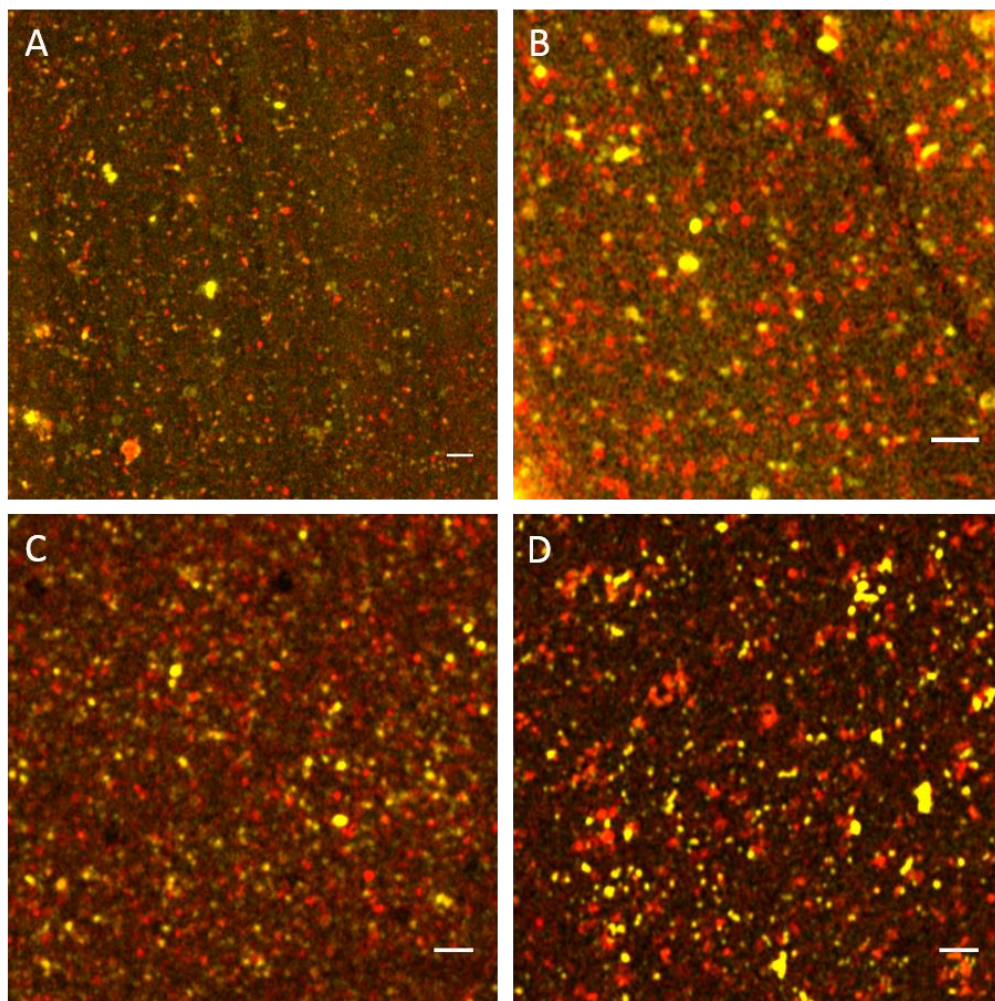

**Figure S11.** Coimmobilization of azide functionalized polymersomes (containing bodipy, red) and SRB labeled methacrylate functionalized nanoassemblies (yellow): A-B) polymersomes and C-D) micelles. Scale bars: 2  $\mu\text{m}$ .

To study the stability of the immobilized polymersomes, the surfaces were washed with ethanol after immobilization of polymersomes.

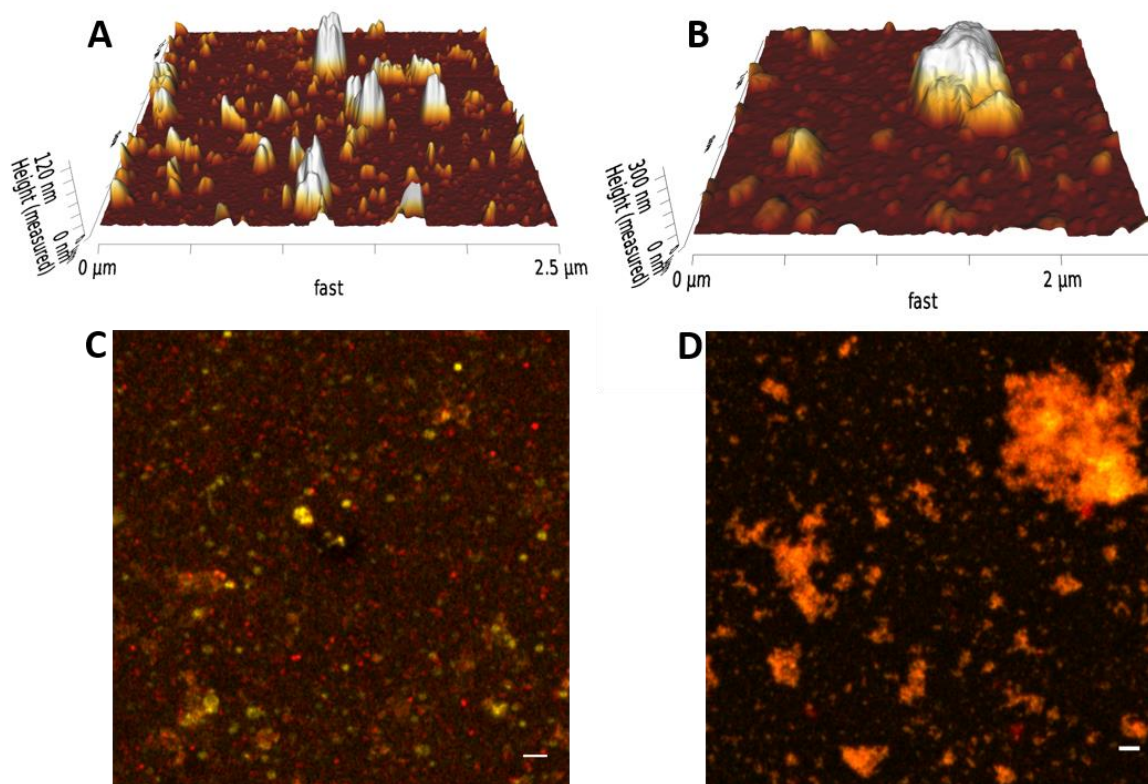

**Figure S12.** A) AFM of coimmobilized azide and methacrylate functionalized polymersomes. B) AFM image of the same surface after ethanol treatment. C) CLSM micrograph of coimmobilized azide and methacrylate functionalized polymersomes. D) CLSM micrograph of the same surface after ethanol treatment. Scale bars (C and D): 2 μm.
